# Supplementary material for: A turn-on green channel Zn2+ sensor and the resulting zinc(ii) complex as a red channel HPO42− ion sensor: a new approach
Source: Royal Society of Chemistry journal article supplement (doi:10.1039/c7ra02175e), 2017-01-01
Supplement: c7ra02175e1.pdf [file c7ra02175e1.pdf]

## *Supplementary material*

**For**

***A turn-on ‘green channel’ Zn<sup>2+</sup> sensor and the resulting zinc(II) complex as a  
‘red channel’ HPO<sub>4</sub><sup>2-</sup> ion sensor: a new approach †***

Somenath Lohar,<sup>a</sup> Siddhartha Pal,<sup>a</sup> Manjira Mukherjee,<sup>a</sup> Abhishek Maji,<sup>a</sup> Nicola Demitri<sup>b</sup> and  
Pabitra Chattopadhyay<sup>\*,a</sup>

<sup>a</sup>*Department of Chemistry, Burdwan University, Golapbag, Burdwan-713104, West Bengal,  
India*

<sup>b</sup>*Elettra – Sincrotrone Trieste, S.S. 14 Km 163.5 in Area Science Park, 34149 Basovizza –  
Trieste, Italy*

## **CONTENTS**

1. **Fig. S1.** <sup>1</sup>H NMR spectrum of L'H in DMSO-d<sub>6</sub>
2. **Fig. S2.** Mass spectrum of L'H
3. **Fig. S3.** IR spectrum of L'H
4. **Fig. S4.** <sup>13</sup>C NMR spectrum of L'H
5. **Fig. S5.** Mass spectrum of the dinuclear zinc(II) complex (1)
6. **Fig.S6.** IR spectrum of dinuclear zinc(II) complex(1)
7. **Fig. S7.** <sup>1</sup>H NMR spectrum of dinuclear zinc(II) complex(1) in DMSO-d<sub>6</sub>
8. **Fig. S8.** Time-dependence profile for fluorescent detection of Zn<sup>2+</sup> ion
9. **Fig. S9.** Plot for fluorescence intensity vs. concentration of Zn<sup>2+</sup> ions
10. **Fig. S10.** Selectivity study of L'H in presence of different metal ions
11. **Fig. S11.** Change of relative fluorescence intensity profile of L'H in presence of different cations
12. **Fig. S12.** Job's plot of L'H.
13. **Fig. S13.** The pH dependence of fluorescence spectra of L'H in absence and presence of Zn<sup>2+</sup>

14. **Fig. S14.** plot for fluorescence intensity vs. concentration of  $\text{HPO}_4^{2-}$  ions
15. **Fig. S15.** Time-dependence profile for fluorescent detection of  $\text{HPO}_4^{2-}$  ions
16. **Fig. S16.** Selectivity study of dinuclear zinc(II) complex(1) and Change of relative fluorescence intensity profile of 1 in presence of different anions.
17. **Fig. S17.** Calibration curve for the nanomolar range, for calculating the LOD of  $\text{HPO}_4^{2-}$  ions by dinuclear zinc(II) complex(1) in DMSO solution.
18. **Fig. S18.** Solvent effect of  $\text{L}'\text{H}$ ,  $\text{L}'\text{H}+\text{Zn}^{2+}$  ion(1) and  $1+\text{HPO}_4^{2-}$  ions
19. **Fig. S19.** UV-vis and Fluorescence spectra of  $\text{L}'\text{H}$ ,  $\text{L}'\text{H}+\text{base}$ , 1,  $1+\text{HPO}_4^{2-}$  in DMSO solution at 25 °C.
20. **Fig. S20.** Mass spectrum of the dinuclear zinc(II) complex (1) in presence of of  $\text{HPO}_4^{2-}$  ion.
21. **Fig. S21.**  $^1\text{H}$  NMR spectrum of the dinuclear zinc(II) complex (1) in presence of of  $\text{HPO}_4^{2-}$  ion.
16. **Table S1** Crystal data and details of refinements for dinuclear zinc(II) complex (1).
17. **Table S2** Selected bond distances (Å) and bond angles (°) for dinuclear zinc(II) complex (1).
18. **Table S3** Life time detail of 1 in absence and presence of  $\text{HPO}_4^{2-}$  ions

## Materials and physical measurements

*2,6-diformyl-4-methyl-phenol* was synthesized following the literature procedure<sup>1</sup>, *3-amino-5-phenylpyrazole*, zinc acetate dihydrate, all other salts were purchased from Sigma-Aldrich and were used without further purification. Electrospray ionization Mass spectra (ESI-MS) were determined on a Qtof Micro YA263 and Thermochem Exactive Plus mass spectrometer. Microanalysis (C, H, and N) was performed using a Perkin-Elmer 2400 elemental analyzer. Fourier transform infrared (FTIR) spectra was done as KBr pellets using a Prestige-21 FTIR spectrophotometers.  $^1\text{H}$  NMR and  $^{13}\text{C}$  NMR spectra were recorded on a JEOL 400 and Bruker Avance DPX 400 MHz spectrometer instrument respectively in  $\text{DMSO-d}_6$  using TMS as an internal standard. Melting points were determined on a hot-plate melting point apparatus in an open-mouth capillary and are uncorrected. Electronic spectra were recorded with a Shimadzu UV-1800 spectrophotometer. Fluorescence spectra measurements were performed on a Hitachi F-4500 spectrofluorimeter.

The spectroscopic studies of  $\text{L}'\text{H}$  were recorded in DMSO. For the selectivity study of  $\text{L}'\text{H}$ , stock solutions ( $\sim 10^{-2}$  M) of different metal ions were prepared taking nitrate salts of  $\text{Na}^+$ ,  $\text{K}^+$ ,  $\text{Cu}^{2+}$ ,  $\text{Cr}^{3+}$ ,  $\text{Al}^{3+}$ ,  $\text{Pb}^{2+}$ ,  $\text{Cd}^{2+}$ ,  $\text{Ag}^+$ ; acetate salt of  $\text{Mn}^{2+}$ ,  $\text{Zn}^{2+}$ ; chloride salts of  $\text{Co}^{2+}$ ,  $\text{Ni}^{2+}$ ,  $\text{Ca}^{2+}$ ,  $\text{Hg}^{2+}$ ,  $\text{Mg}^{2+}$ ,  $\text{Fe}^{3+}$ , and  $\text{Fe}^{2+}$  sulphate. In this selectivity study, the amount of the metal ions was fifty times greater than

that of the probe used. Fluorescence titration with zinc acetate was performed in DMSO varying the metal concentration from 0 to 15  $\mu\text{M}$  and the concentration of **L'H** was fixed at 5  $\mu\text{M}$ . Tetrabutylammonium salts of dihydrogen phosphate, acetate, halides ( $\text{F}^-$ ,  $\text{Cl}^-$ ,  $\text{Br}^-$ ,  $\text{I}^-$ ); and sodium/potassium salts of arsenate, arsenite, bicarbonate, nitrate, chlorate, monohydrogen phosphate, phosphate, azide, cyanide, thiocyanate, sulphate and pyrophosphate etc were used for the selectivity study of the receptor towards different anions. Fluorescence titration with  $\text{HPO}_4^{2-}$  was carried out adding the anion concentration upto 3equivalent [concentration of dinuclear zinc(II) complex (**1**) was fixed at 25  $\mu\text{M}$ ].

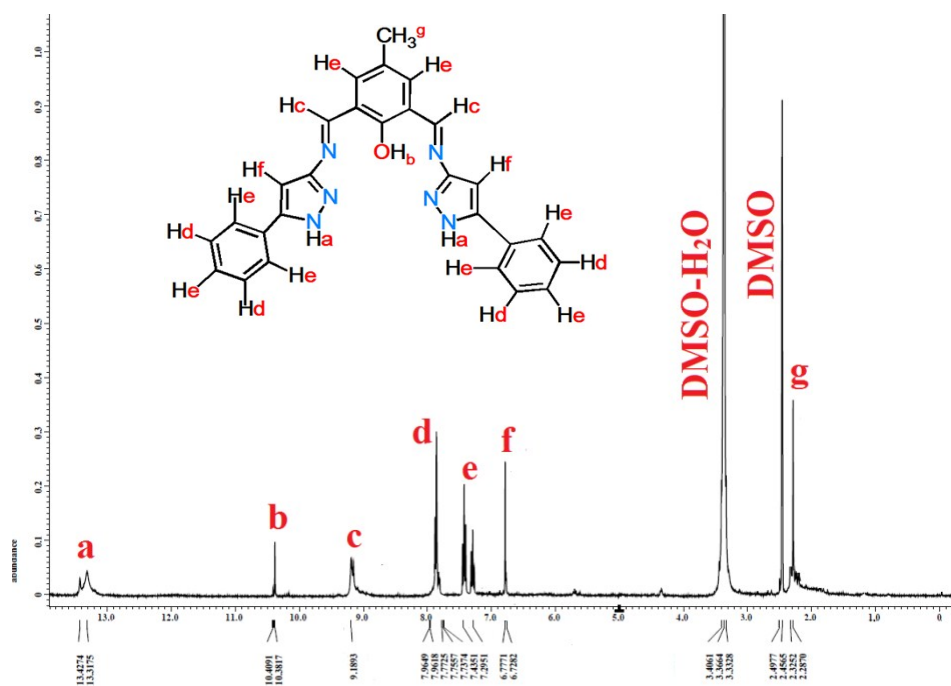

**Fig. S1.**  $^1\text{H}$  NMR spectrum of **L'H** in  $\text{DMSO-d}_6$

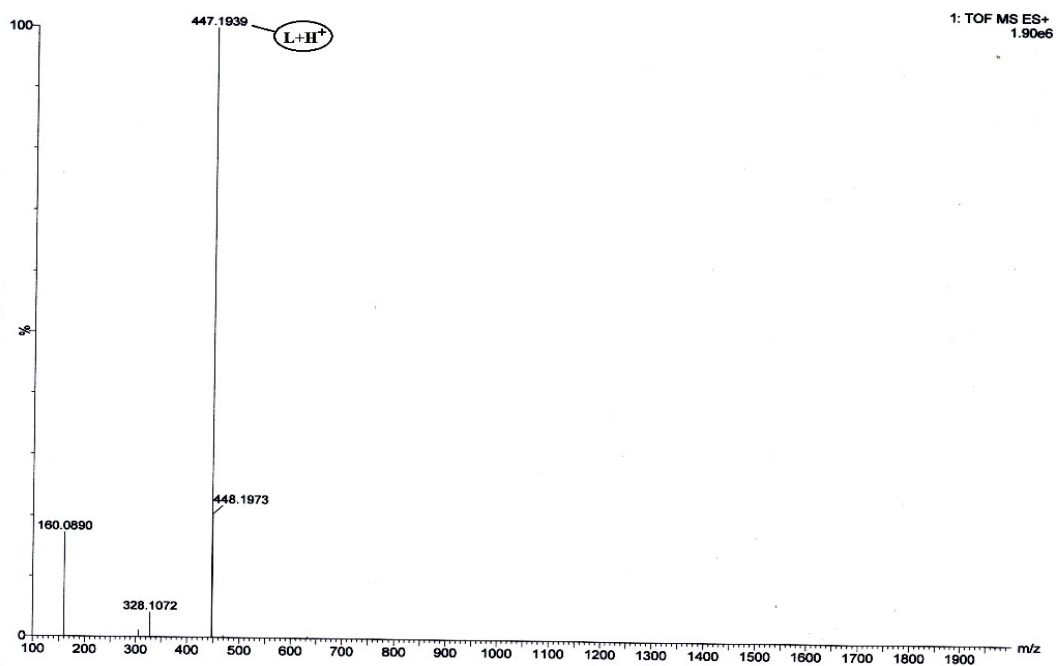

Fig.S2. Mass spectrum of L'H

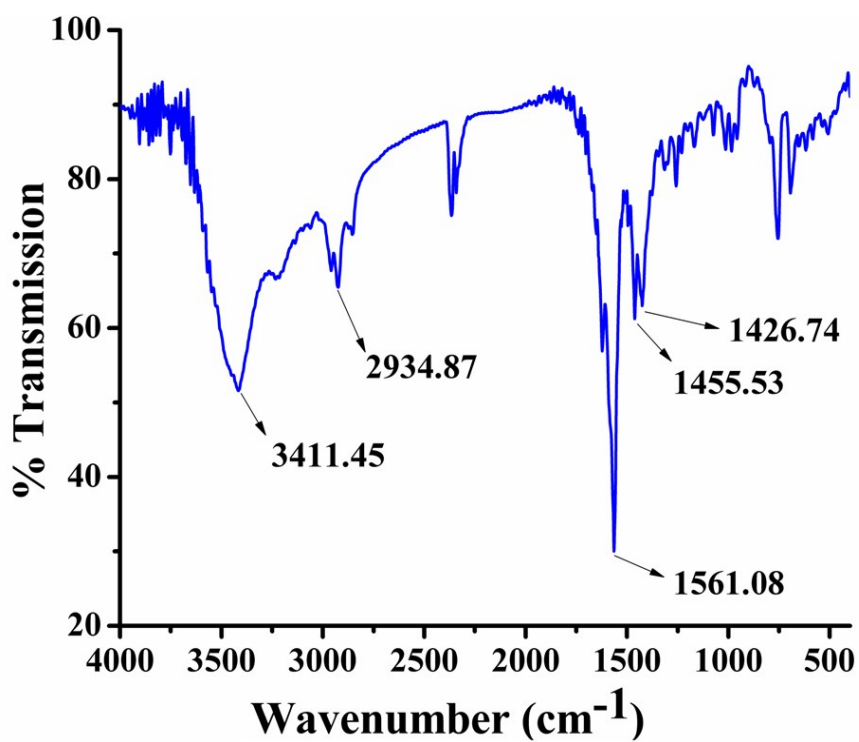

Fig. S3. IR spectrum of L'H

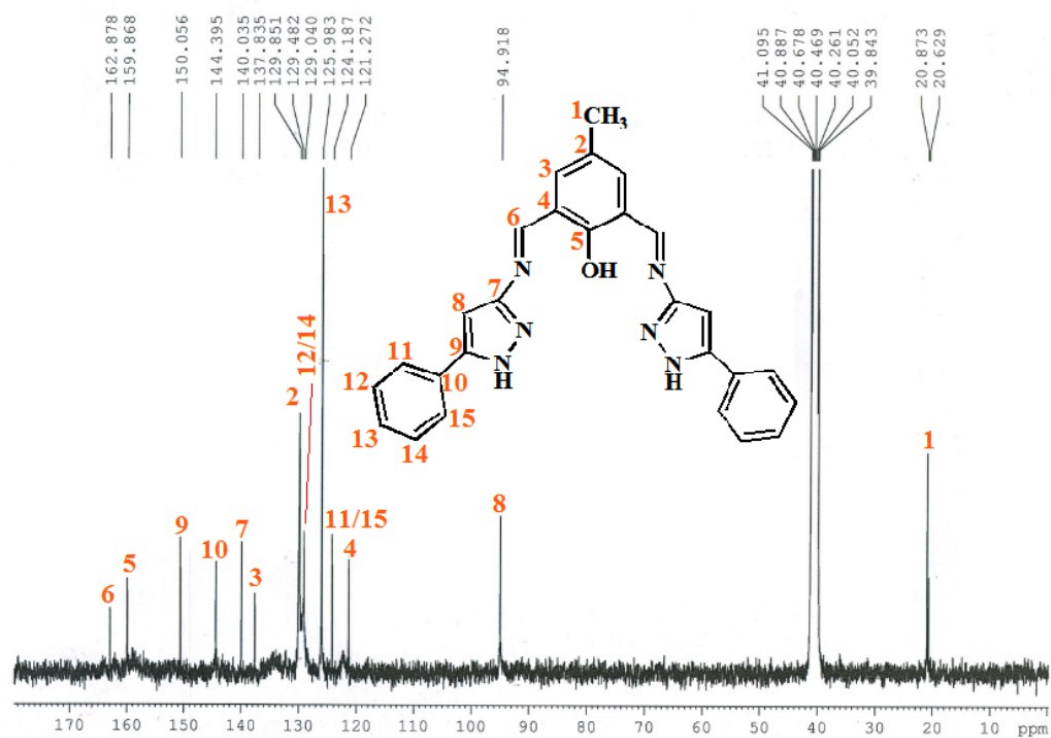

**Fig. S4.**  $^{13}\text{C}$  NMR spectrum of L'H in  $\text{DMSO-d}_6$

PF51COMPLEX #1 RT: 0.00 AV: 1 NL: 2.43E8  
T: FTMS + p ESI Full ms [100.00-1500.00]

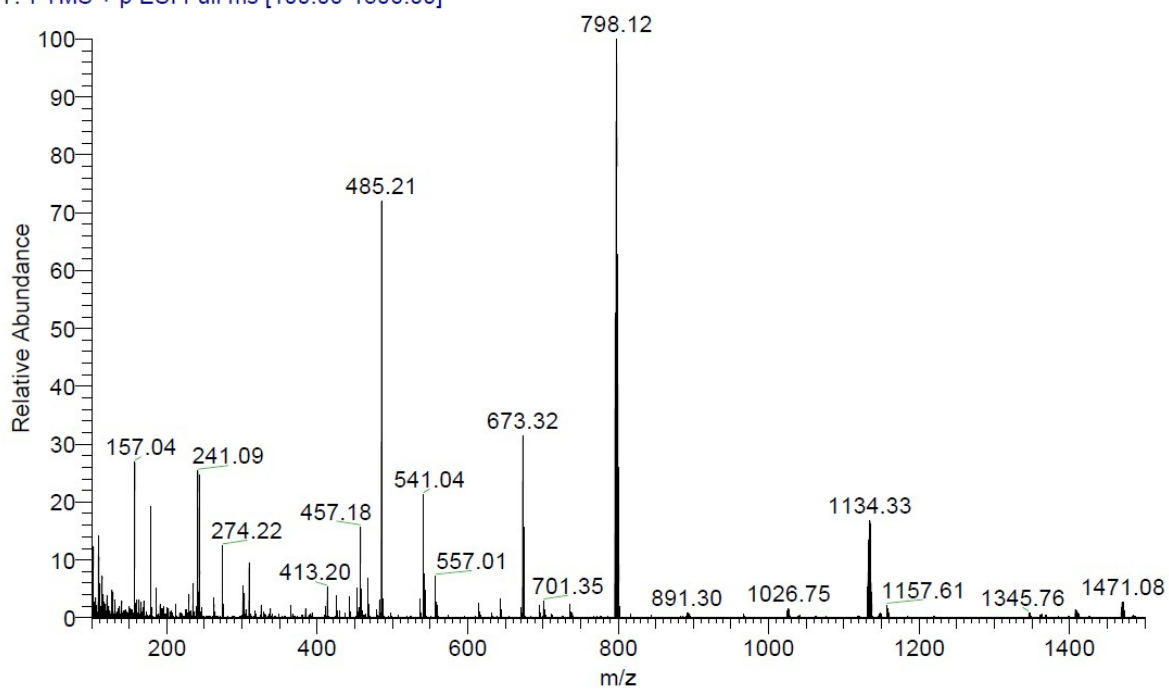

**Fig.S5.** Mass spectrum of dinuclear zinc(II) complex (1)

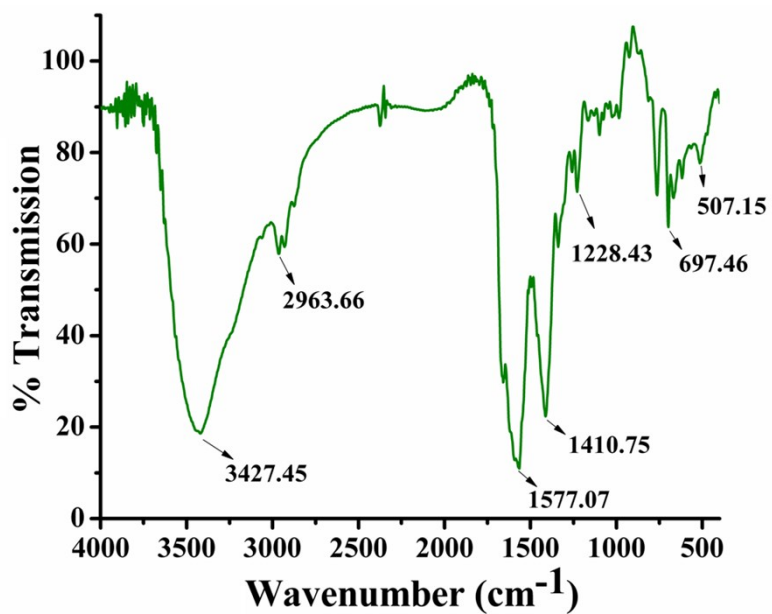

Fig. S6. IR spectrum of dinuclear zinc(II) complex (1)

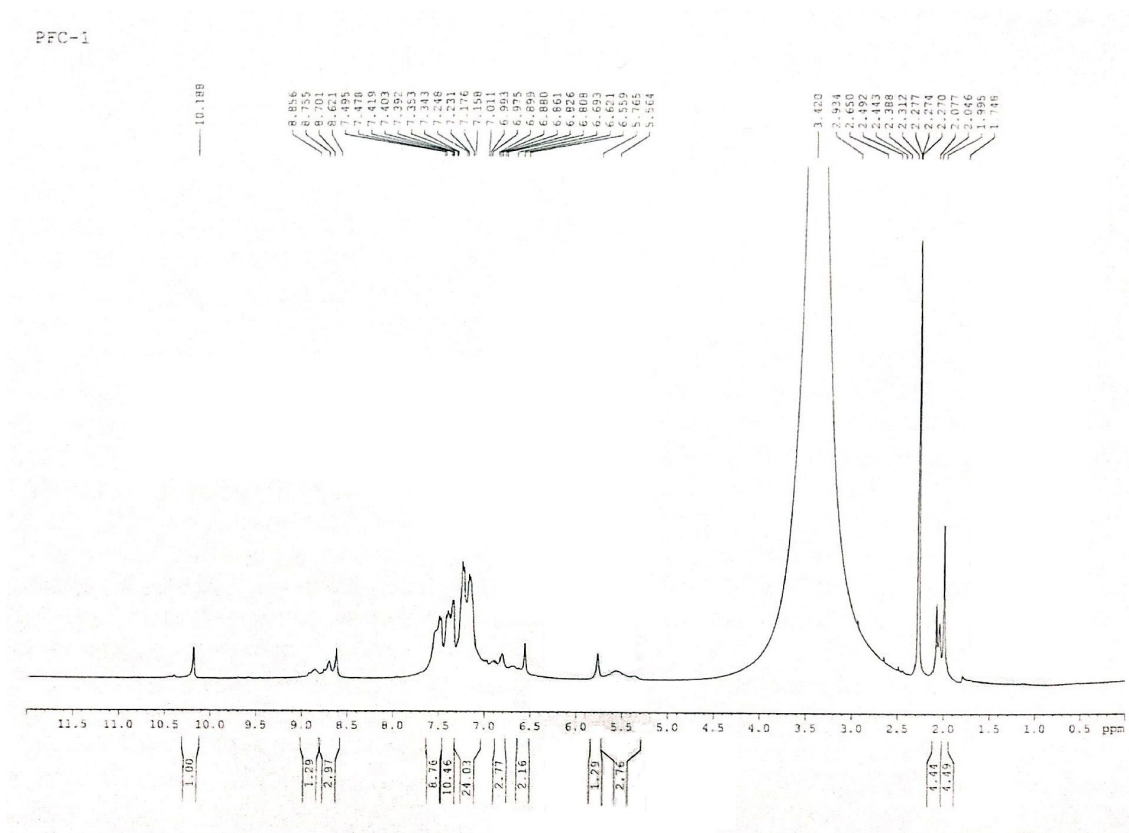

Fig. S7. <sup>1</sup>H NMR spectrum of dinuclear zinc(II) complex (1) in DMSO-d<sub>6</sub>

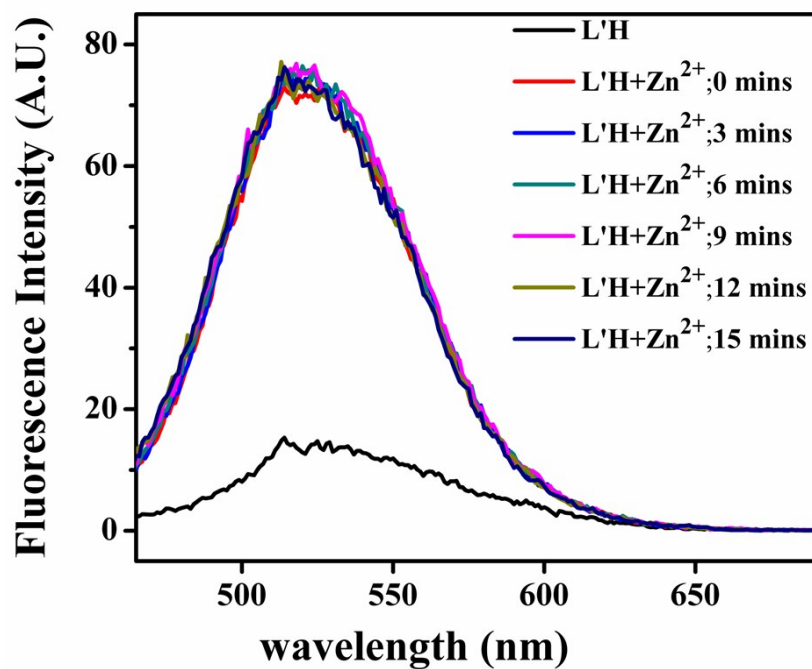

Fig. S8. Time-dependence profile for fluorescent detection of Zn<sup>2+</sup> ion

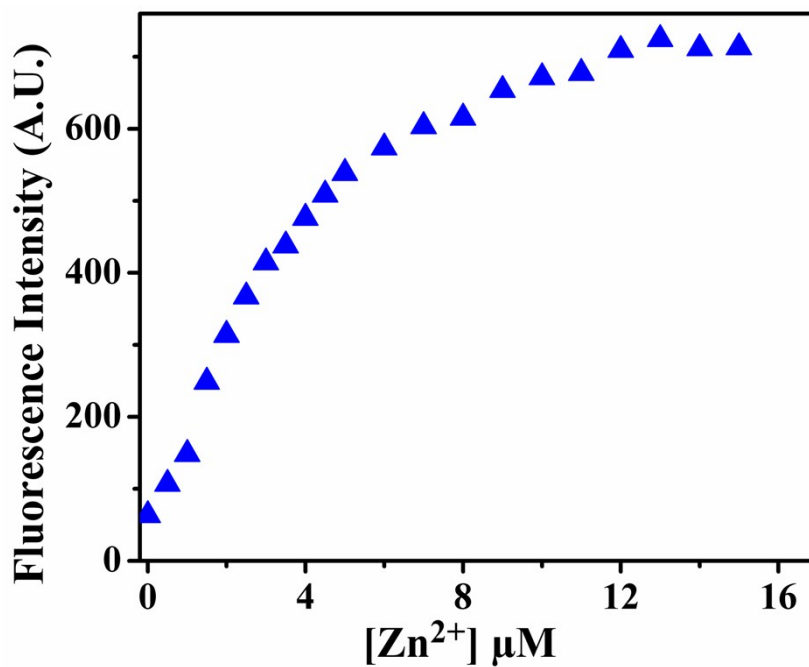

Fig. S9. Plot for fluorescence intensity vs. concentration of Zn<sup>2+</sup> ions

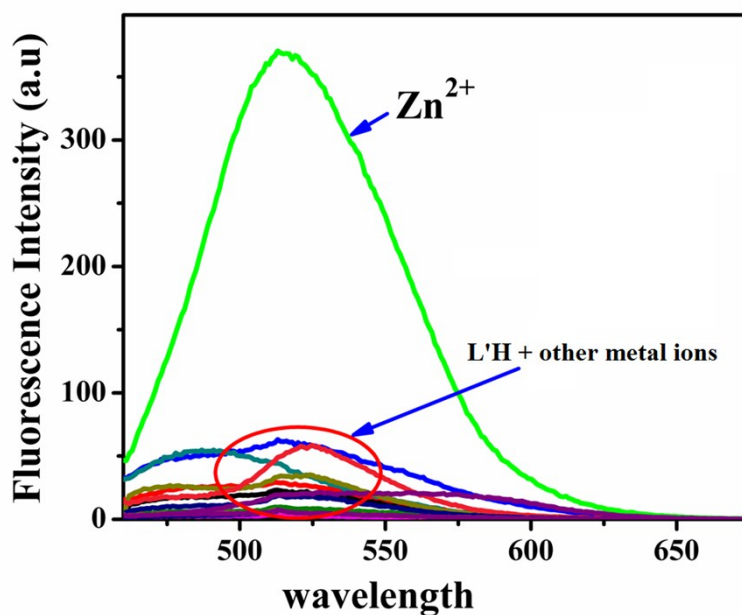

Fig. S10. Selectivity study of L'H in presence of different metal ions.

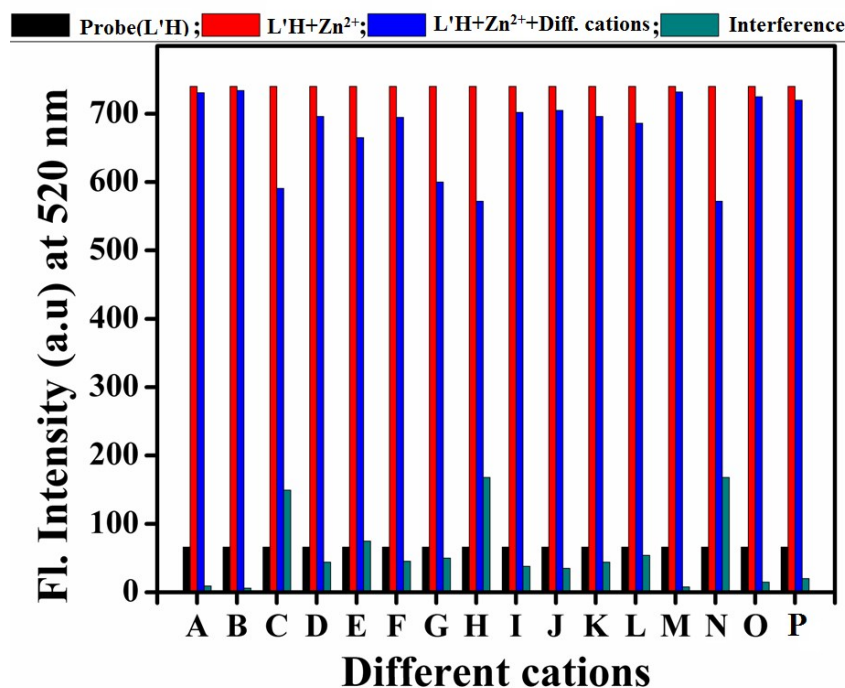

Fig. S11. Change of relative fluorescence intensity profile of L'H in presence of different cations in DMSO solution (A) Ca<sup>2+</sup>, (B) Mg<sup>2+</sup>, (C) Al<sup>3+</sup>, (D) Mn<sup>2+</sup>, (E) Co<sup>2+</sup>, (F) Pb<sup>2+</sup>, (G) Cr<sup>3+</sup>, (H) Ni<sup>2+</sup>, (I) Cd<sup>2+</sup>, (J) Fe<sup>2+</sup>, (K) Fe<sup>3+</sup>, (L) Hg<sup>2+</sup>, (M) Cu<sup>2+</sup>, (N) Na<sup>+</sup>, (O) K<sup>+</sup>, (P) Ag<sup>+</sup>.



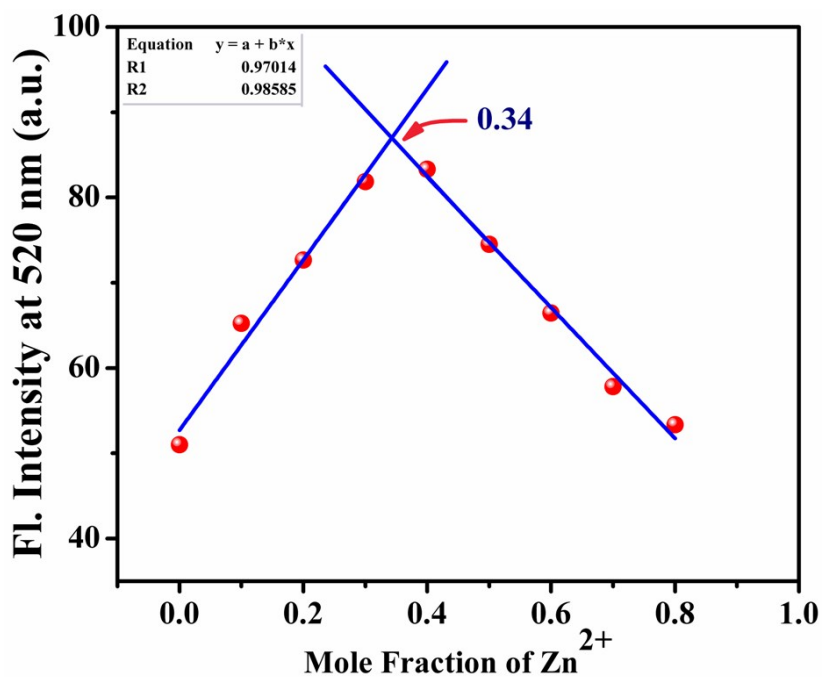

Fig. S12. Job's plot of L'H showing 1:2 ( $Zn^{2+}$ : L'H) stoichiometry

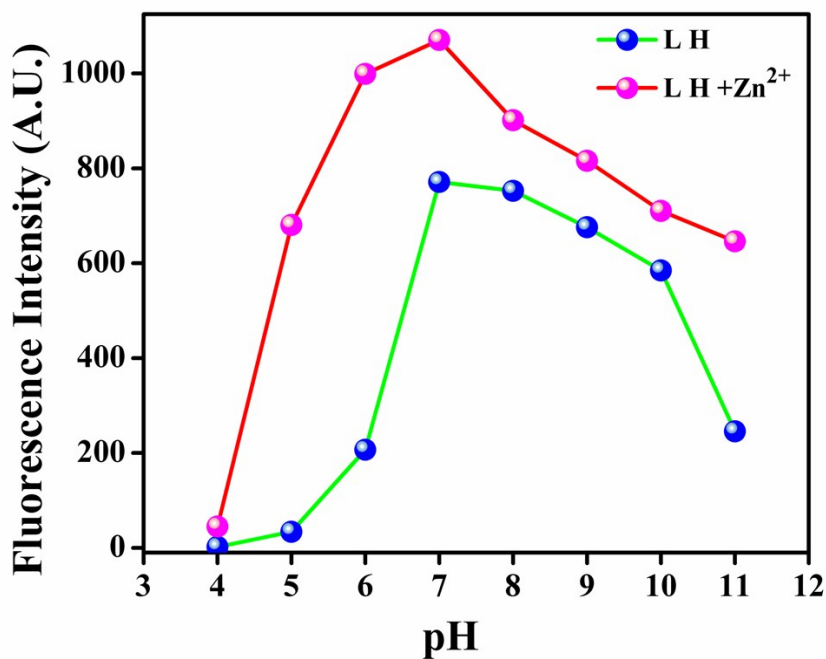

Fig. S13. The pH dependence of fluorescence spectra of L'H in absence and presence of  $Zn^{2+}$

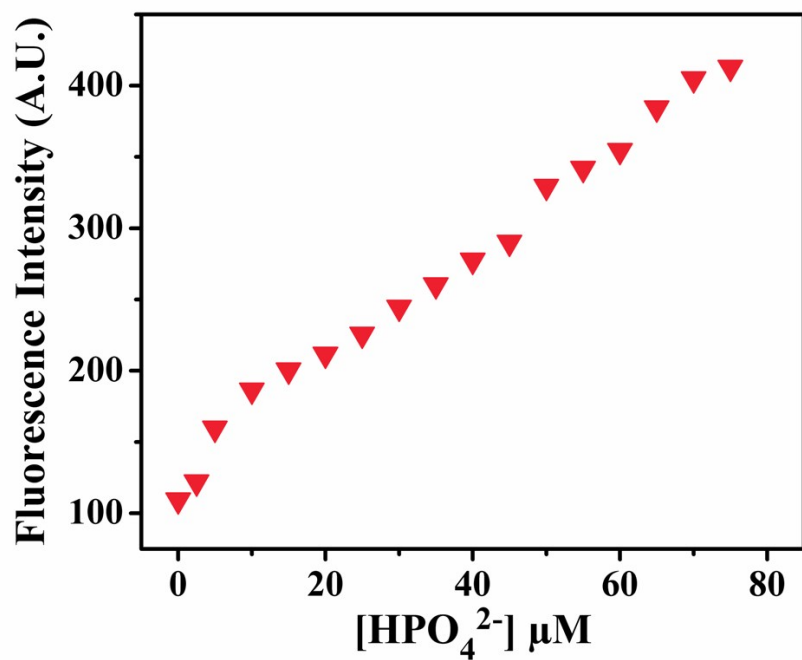

Fig. S14. Plot for fluorescence intensity vs. concentration of  $\text{HPO}_4^{2-}$  ions

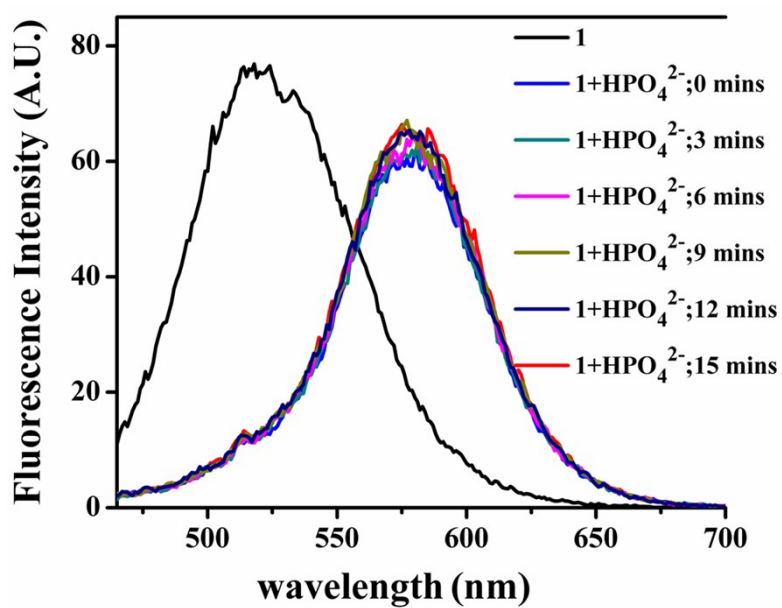

Fig. S15. Time-dependence profile for fluorescent detection of  $\text{HPO}_4^{2-}$  ions

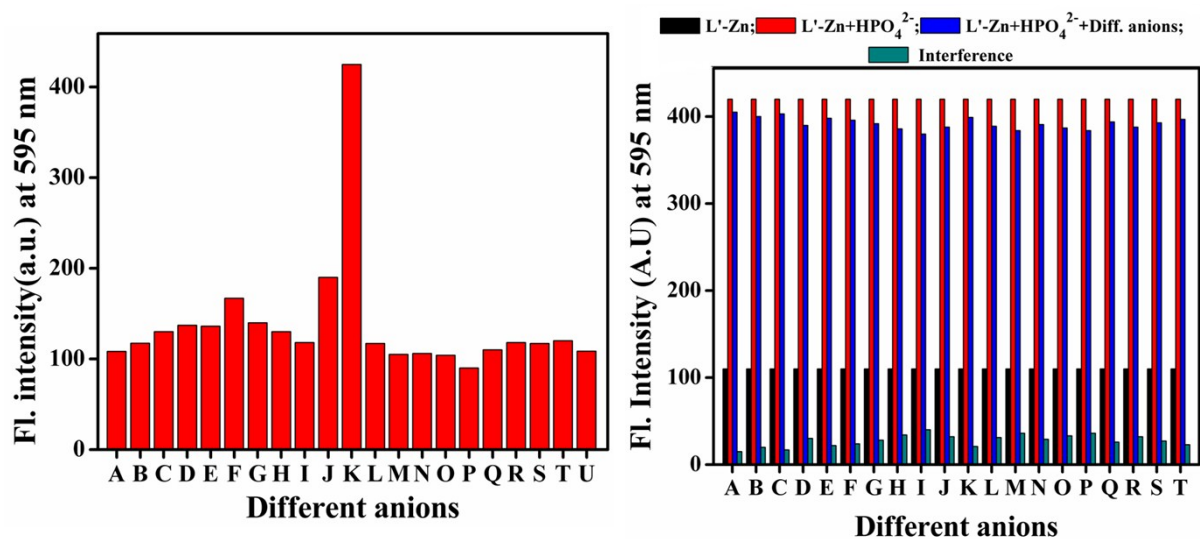

**Fig. S16.** Selectivity study of dinuclear zinc(II) complex(1) in presence of different metal ions[left] Change of relative fluorescence intensity profile of dinuclear zinc(II) complex (1) in presence of different anions in DMSO solution (A) SCN<sup>-</sup>, (B) PO<sub>4</sub><sup>3-</sup>, (C) MO<sub>4</sub><sup>2-</sup>, (D) CN<sup>-</sup>, (E) F<sup>-</sup>, (F) Cl<sup>-</sup>, (G) Br<sup>-</sup>, (H) I<sup>-</sup>, (I) HAsO<sub>4</sub><sup>2-</sup>, (J) S<sup>2-</sup>, (K) AcO<sup>-</sup>, (L) H<sub>2</sub>AsO<sub>4</sub><sup>-</sup>, (M) SO<sub>4</sub><sup>2-</sup>, (N) H<sub>2</sub>PO<sub>4</sub><sup>-</sup>, (O) HSO<sub>4</sub><sup>-</sup>, (P) NO<sub>3</sub><sup>-</sup>, (Q) CO<sub>3</sub><sup>2-</sup>, (R) HCO<sub>3</sub><sup>-</sup>, (S) ClO<sub>4</sub><sup>-</sup> and (T) P<sub>2</sub>O<sub>7</sub><sup>4-</sup> [right].

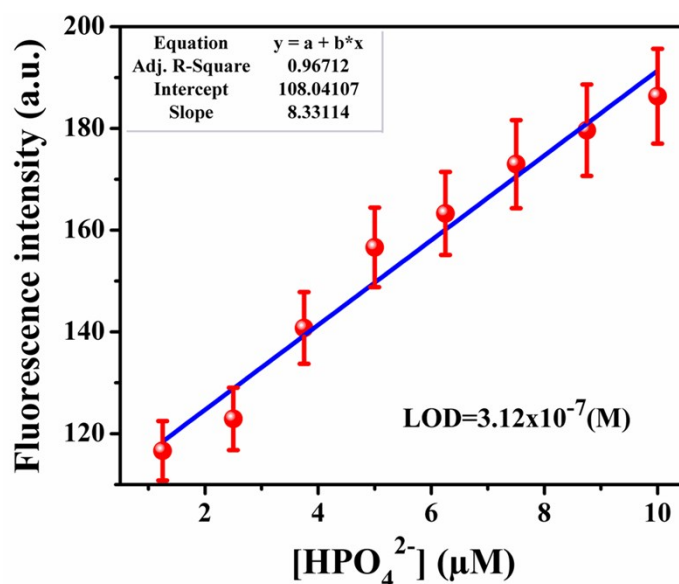

**Fig. S17.** Calibration curve for the nanomolar range, for calculating the LOD of HPO<sub>4</sub><sup>2-</sup> ions by dinuclear zinc(II) complex (1) in DMSO solution.

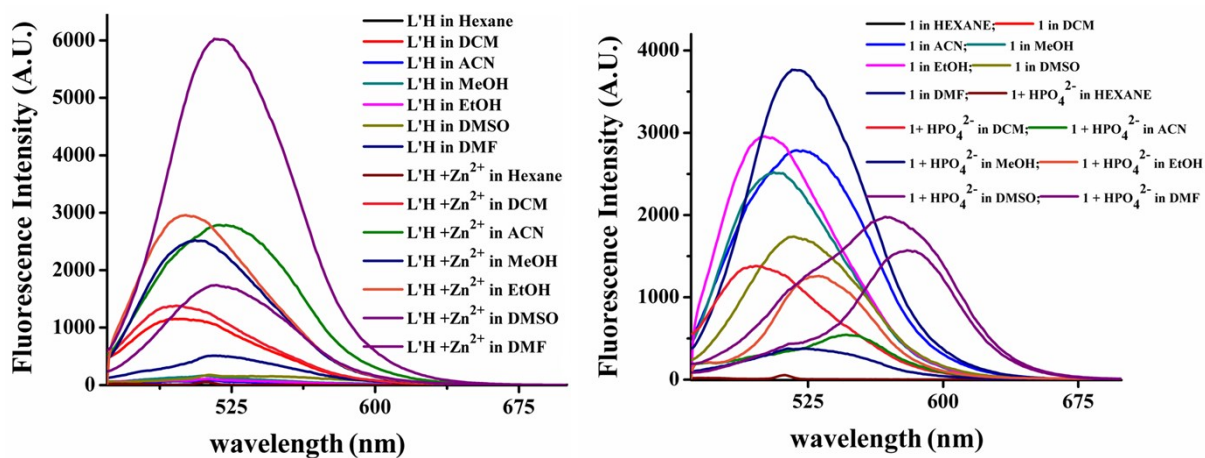

Fig. S18. Solvent effect of L'H, L'H+Zn<sup>2+</sup> ion(1) and 1+HPO<sub>4</sub><sup>2-</sup> ions

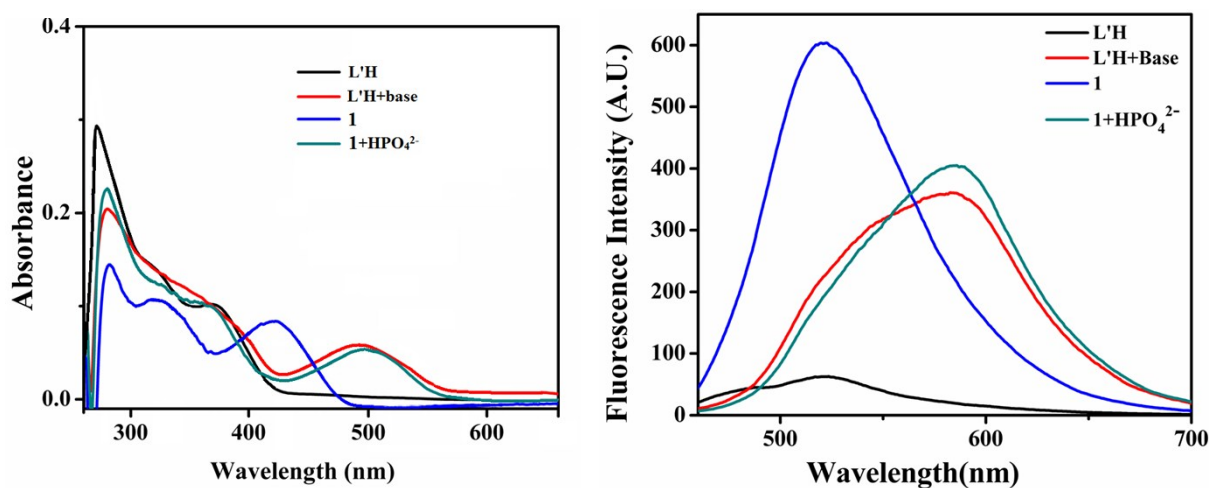

Fig. S19. UV-vis and Fluorescence spectra of L'H, L'H +base, 1 and 1+HPO<sub>4</sub><sup>2-</sup> in DMSO at 25 °C

PF\_Zn\_HPO42-NEGATIVE #3-449 RT: 0.01-2.00 AV: 447 NL: 6.17E7  
T: FTMS - p ESI Full ms [150.00-2000.00]

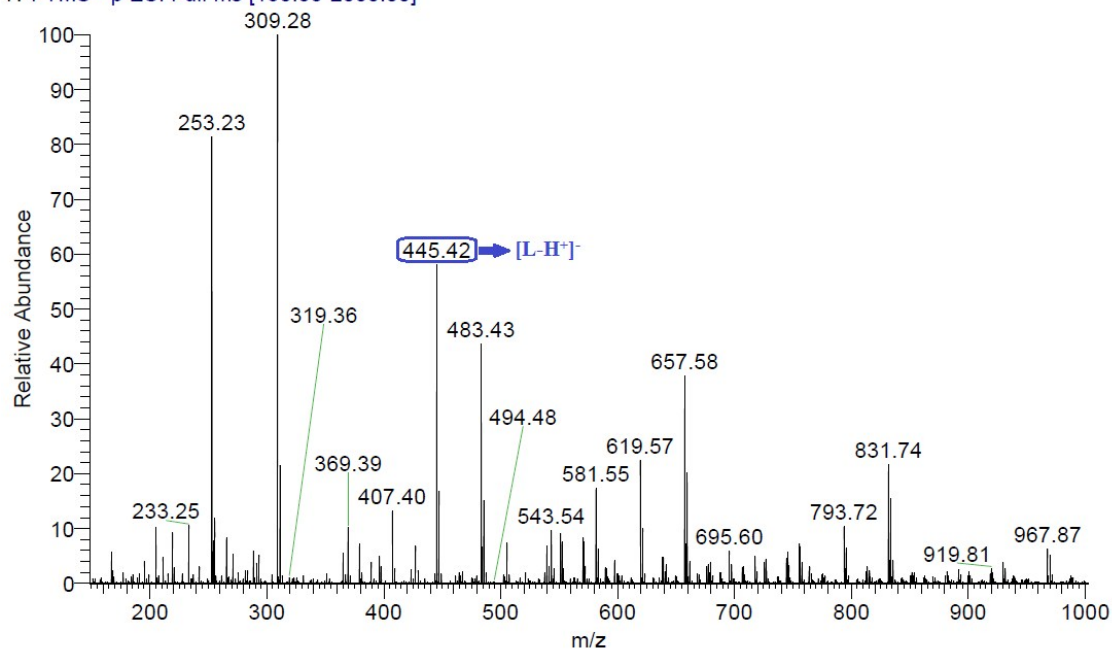

**Fig. S20.** Mass spectrum of dinuclear zinc(II) complex (**1**) in presence of HPO<sub>4</sub><sup>2-</sup> ions

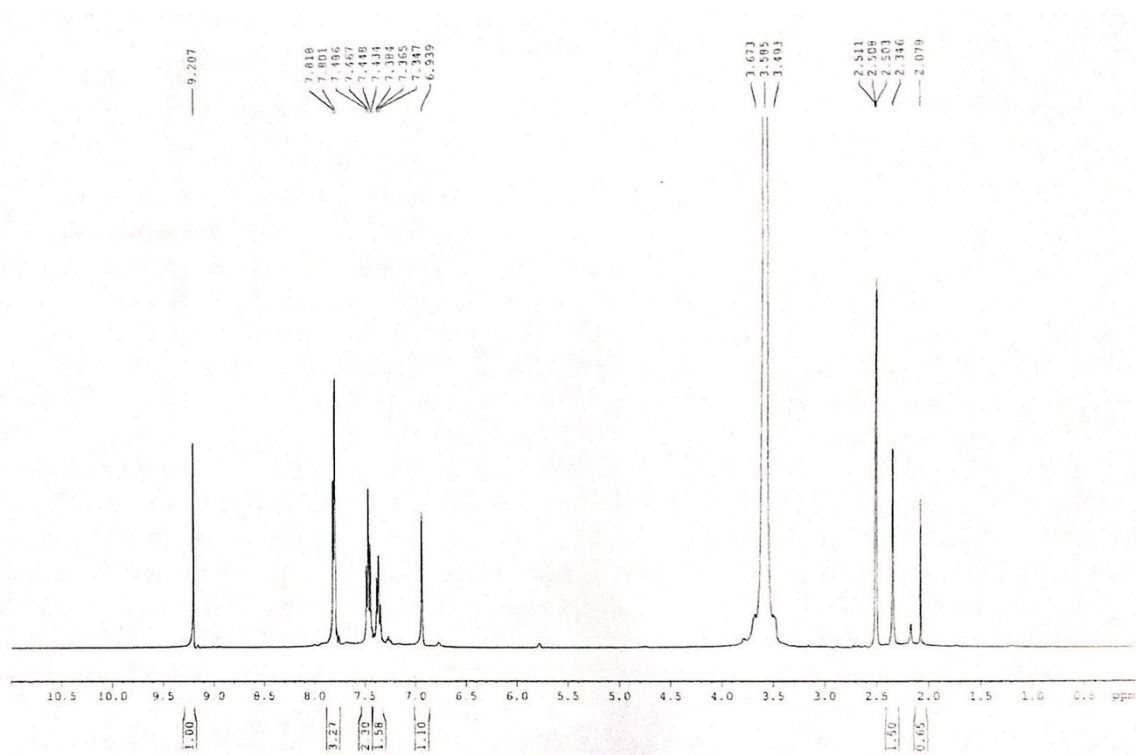

**Fig. S21.** <sup>1</sup>H NMR spectrum of the dinuclear zinc(II) complex (**1**) in presence of HPO<sub>4</sub><sup>2-</sup> ion in DMSO-d<sub>6</sub>.

**Table S1** Crystal data and details of refinements for dinuclear Zinc(II) complex (**1**).

|                          |                                                                                |                                                       |               |
|--------------------------|--------------------------------------------------------------------------------|-------------------------------------------------------|---------------|
| Empirical Formula        | C <sub>90</sub> H <sub>72</sub> N <sub>18</sub> O <sub>7</sub> Zn <sub>2</sub> | $\rho_{\text{calc}}$ (g/cm <sup>3</sup> )             | 1.287         |
| Formula Weight           | 1648.39                                                                        | $\mu$ (mm <sup>-1</sup> )                             | 0.565         |
| Crystal system           | monoclinic                                                                     | F(000)                                                | 1708          |
| Space group              | <i>P</i> c                                                                     | $\theta$ range (deg)                                  | 1.14 - 25.27° |
| <i>a</i> (Å)             | 18.413(4)                                                                      | Reflections collected                                 | 28734         |
| <i>b</i> (Å)             | 16.514(3)                                                                      | Reflections independent                               | 14884         |
| <i>c</i> (Å)             | 14.665(3)                                                                      | R <sub>int</sub>                                      | 0.0899        |
| $\beta$ (deg)            | 107.49(3)                                                                      | Goodness of fit                                       | 1.124         |
| Volume (Å <sup>3</sup> ) | 4253.2(16)                                                                     | Final R indices [ <i>I</i> > 2 $\sigma$ ( <i>I</i> )] | R = 0.1063    |
| <i>Z</i>                 | 2                                                                              |                                                       | wR2 = 0.2630  |

**Table S2** Selected bond distances (Å) and bond angles (°) for dinuclear Zinc(II) complex (**1**).

| <b>Bond lengths (Å)</b> |           |                   |           |
|-------------------------|-----------|-------------------|-----------|
| Zn(1)-O(1)              | 2.083(8)  | Zn(1)-O(1w)       | 2.200(10) |
| Zn(1)-N(1)              | 2.109(12) | Zn(2)-O(3)        | 1.943(9)  |
| Zn(1)-O(2)              | 2.113(9)  | Zn(2)-O(4)        | 1.952(9)  |
| Zn(1)-N(7)              | 2.123(11) | Zn(2)-N(13)       | 2.082(11) |
| Zn(1)-O(2w)             | 2.167(12) | Zn(2)-N(16)       | 2.097(10) |
| <b>Bond angles (°)</b>  |           |                   |           |
| O(1)-Zn(1)-N(1)         | 83.4(4)   | O(1)-Zn(1)-O(1w)  | 177.5(4)  |
| O(1)-Zn(1)-O(2)         | 90.6(3)   | N(1)-Zn(1)-O(1w)  | 95.3(4)   |
| N(1)-Zn(1)-O(2)         | 90.1(4)   | O(2)-Zn(1)-O(1w)  | 91.5(4)   |
| O(1)-Zn(1)-N(7)         | 90.2(4)   | N(7)-Zn(1)-O(1w)  | 91.4(4)   |
| N(1)-Zn(1)-N(7)         | 170.4(4)  | O(2w)-Zn(1)-O(1w) | 85.3(4)   |
| O(2)-Zn(1)-N(7)         | 82.9(4)   | O(3)-Zn(2)-O(4)   | 158.6(4)  |
| O(1)-Zn(1)-O(2w)        | 92.5(4)   | O(3)-Zn(2)-N(13)  | 92.6(4)   |
| N(1)-Zn(1)-O(2w)        | 91.1(4)   | O(4)-Zn(2)-N(13)  | 100.1(4)  |
| O(2)-Zn(1)-O(2w)        | 176.8(4)  | O(3)-Zn(2)-N(16)  | 100.7(4)  |
| N(7)-Zn(1)-O(2w)        | 96.3(4)   | O(4)-Zn(2)-N(16)  | 93.1(4)   |
|                         |           | N(13)-Zn(2)-N(16) | 103.2(4)  |

**Table S3** Life time detail of dinuclear zinc(II) complex (**1**) in absence and presence of HPO<sub>4</sub><sup>2-</sup> ions

|                                                   | <b>B<sub>1</sub></b> | <b>B<sub>2</sub></b> | <b>τ<sub>1</sub>(ns)</b> | <b>τ<sub>2</sub>(ns)</b> | <b>τ<sub>av</sub>(ns)</b> | <b>χ<sup>2</sup></b> | <b>φ</b> | <b>K<sub>r</sub></b> | <b>K<sub>nr</sub></b> | <b>K<sub>r</sub>/K<sub>nr</sub></b> |
|---------------------------------------------------|----------------------|----------------------|--------------------------|--------------------------|---------------------------|----------------------|----------|----------------------|-----------------------|-------------------------------------|
| <b>1</b>                                          | 94.05                | 5.95                 | 0.487                    | 1.79                     | 0.565                     | 1.02                 | 0.157    | 0.278                | 1.49                  | 0.186                               |
| <b>1</b> + HPO <sub>4</sub> <sup>2-</sup><br>ions | 100                  | -                    | 2.25                     | -                        | 2.25                      | 1.00                 | 0.342    | 0.152                | 0.292                 | 0.52                                |

## References

- [1] R.R. Gagne, C.L. Spiro, T.J. Smith, C.A. Hamann, W.R. Thies and A.K. Schiemke, *J. Am. Chem. Soc.*, 1981, **103**, 4073.
